# Supplementary material for: Assessing the undesired impacts on water sustainability from climate change mitigation technologies in fossil-based power generation
Source: Royal Society of Chemistry journal article supplement (doi:10.1039/d4ew00122b), 2024-01-01
Supplement: d4ew00122b1.pdf [file d4ew00122b1.pdf]

## 1 Electronic Supplementary Information

### 2 **Assessing the undesired impacts on water sustainability from climate change** 3 **mitigation technologies in fossil-based power generation**

<sup>a</sup> School of Chemical and Metallurgical Engineering, University of the Witwatersrand, Johannesburg, 1 Jan Smuts Ave, Braamfontein, Johannesburg, 2050, South Africa

<sup>b</sup> School of Chemical and Metallurgical Engineering, University of the Witwatersrand, Johannesburg, 1 Jan Smuts Ave, Braamfontein, Johannesburg, 2050, South Africa

<sup>c</sup> Department of Energy & Process Engineering, Norwegian University of Science and Technology (NTNU), Kolbjørn Hejes v 1B, Trondheim 7034, Norway

\*Corresponding Author: [thomas.a.adams@ntnu.no](mailto:thomas.a.adams@ntnu.no)

4 Prebantha Moodley,<sup>a</sup> Kevin Harding<sup>b</sup> and Thomas A. Adams II<sup>\*c</sup>

## 5 **1 Terminology**

6 Table ESI 1: Terminology used in this work

| Term                        | Descriptions as used in this work                                                                                                                                                                                                                                                                                                                                                                                                                                                                                                                                                                                                                                                                                                                                       |
|-----------------------------|-------------------------------------------------------------------------------------------------------------------------------------------------------------------------------------------------------------------------------------------------------------------------------------------------------------------------------------------------------------------------------------------------------------------------------------------------------------------------------------------------------------------------------------------------------------------------------------------------------------------------------------------------------------------------------------------------------------------------------------------------------------------------|
| Water withdrawal            | Water consumption represents a “direct measurable impact” and is the <b>net</b> “amount of water that is evaporated, transpired, incorporated into products or crops or otherwise removed from the immediate water environment” (1). It is the volume of water that is made unavailable to other users as a result of the process (2).                                                                                                                                                                                                                                                                                                                                                                                                                                  |
| Water consumption           | Water withdrawal represents a “regional water impact” as water may be returned to the water body for reuse(2) (called discharge). It is the <b>gross</b> “amount of water removed from the ground or diverted from a water source” (1). The reporting of consumption is often favoured over withdrawal(3).                                                                                                                                                                                                                                                                                                                                                                                                                                                              |
| Process water discharge     | In this work, process water discharge is the difference between withdrawal and consumption.                                                                                                                                                                                                                                                                                                                                                                                                                                                                                                                                                                                                                                                                             |
| Water usage                 | In this work “water usage” refers to both water consumption and withdrawal.                                                                                                                                                                                                                                                                                                                                                                                                                                                                                                                                                                                                                                                                                             |
| Water scarcity/Water stress | Water scarcity, sometimes referred to as water stress, is often defined as the ratio of demand of water to what is available. Pfister et al. (4) define this in their work as WTA, which is the ratio of total withdrawals from different users for each watershed to annual freshwater availability.<br><br>The Water Stress Index (WSI), developed by Pfister et al. (4) is calculated as a function of a modified water stress (WTA*)<br><br>$WSI = \frac{1}{1 + e^{-6.4WTA^*} \left( \frac{1}{0.01} - 1 \right)} \quad (1)$ <p>where WTA* is the product of the variation factor (VF) and the ratio of total annual freshwater withdrawals and hydrological availability. The VF distinguishes watersheds that have strongly regulated flows (SRF) and non-SRF:</p> |

| Term | Descriptions as used in this work                                                                                                                                                                                                                                                                                                                                                                                                                                                                             |
|------|---------------------------------------------------------------------------------------------------------------------------------------------------------------------------------------------------------------------------------------------------------------------------------------------------------------------------------------------------------------------------------------------------------------------------------------------------------------------------------------------------------------|
|      | $WTA^* = \begin{cases} \sqrt{VF} \times WTA, & \text{for SRF} \\ VF \times WTA, & \text{for non - SRF} \end{cases} \quad (2)$ <p>and</p> $WTA_i = \frac{\sum_j WU_{ij}}{WA_i} \quad (3)$ <p>where <math>WA_i</math> is annual freshwater availability and <math>WU_{ij}</math> is withdrawals for different users <math>j</math>, for each watershed <math>i</math>. WTA data values(5) are rated between 0 and 5, 0 being low water stress and 5 being high water stress (Luck, Landis and Gassert (5)).</p> |

## 8 2 Final Green Case Data Set

9 The final green case data set includes the detailed water usage results described in the method as well as data from Adams *et al.* (6)

10 Notes:

- 11 a. CO<sub>2</sub> equivalent emissions avoided is calculated using a base case. This column notes which base case was used in the calculation.  
 12 b. CO<sub>2</sub> equivalent emissions avoided is calculated as the difference between the "Total Cradle-To-Plant Exit Greenhouse Gas Emissions" of the base case and the green case  
 13 c. Estimated from base case fuel cycle water usage data and green case heat rate  
 14 d. Estimated from technology reference case operations water usage data and green case heat rate.

15 Table ESI 2: Final green case data set

| Tag                               | Technology/Process              | Net Plant output | As-Reported Electrical Efficiency (%HHV) | Heat Rate (MJ/MWh) | Percentage of CO <sub>2</sub> Removed | Direct Greenhouse Gas Emissions | Total Cradle-To-Plant Exit Greenhouse Gas Emissions | CO <sub>2</sub> Equivalent Emissions Avoided (GHG emissions avoided) |                                 | Fuel Cycle          |                     | Operations Cooling  |                     | Operations Process  |                     | Fuel + Operations   | Fuel + Operations   | Process water discharge |
|-----------------------------------|---------------------------------|------------------|------------------------------------------|--------------------|---------------------------------------|---------------------------------|-----------------------------------------------------|----------------------------------------------------------------------|---------------------------------|---------------------|---------------------|---------------------|---------------------|---------------------|---------------------|---------------------|---------------------|-------------------------|
|                                   |                                 |                  |                                          |                    |                                       |                                 |                                                     | Note a                                                               | Note b                          | Note c              | Note c              | Note d              | Note d              | Note d              | Note d              | Total withdrawal    | Total consumption   |                         |
| Data from Adams <i>et al.</i> (6) |                                 |                  |                                          |                    |                                       |                                 |                                                     |                                                                      |                                 |                     |                     |                     |                     |                     |                     |                     |                     |                         |
|                                   |                                 | MWe              | %HHV                                     | MJ/MWh             | %                                     | (tCO <sub>2</sub> e/MWh)        | (tCO <sub>2</sub> e/MWh)                            |                                                                      | t CO <sub>2</sub> e/MWh avoided | m <sup>3</sup> /MWh     |
| SCPC-2                            | Solvent Based                   | 525              | 27.4                                     | 13139              | 90                                    | 0.215                           | 0.327                                               | SCPC                                                                 | 0.62                            | 0.32                | 0.31                | 3.29                | 2.41                | 0.57                | 0.56                | 4.18                | 3.28                | 0.89                    |
| SCPC-3                            | Solvent Based - Adv.amine       | 837              | 36.1                                     | 9972               | 90                                    | 0.190                           | 0.275                                               | SCPC                                                                 | 0.68                            | 0.24                | 0.24                | 2.50                | 1.83                | 0.44                | 0.43                | 3.17                | 2.49                | 0.68                    |
| SCPC-4                            | Solvent Based - Cansolv         | 822              | 33.8                                     | 10651              | 90                                    | 0.188                           | 0.279                                               | SCPC                                                                 | 0.67                            | 0.26                | 0.25                | 2.67                | 1.95                | 0.46                | 0.46                | 3.39                | 2.66                | 0.73                    |
| SCPC-5                            | Solvent Based - Amine           | 546              | 27.2                                     | 13235              | 90                                    | 0.210                           | 0.323                                               | SCPC                                                                 | 0.63                            | 0.32                | 0.31                | 3.31                | 2.43                | 0.58                | 0.57                | 4.21                | 3.31                | 0.90                    |
| SCPC-6                            | Solvent Based - Adv.Amine       | 616              | 36.5                                     | 9863               | 90                                    | 0.187                           | 0.271                                               | SCPC                                                                 | 0.68                            | 0.24                | 0.23                | 2.47                | 1.81                | 0.43                | 0.42                | 3.14                | 2.46                | 0.67                    |
| SCPC-7                            | Solvent based-Chilled Ammonia   | 549              | 28.4                                     | 12676              | 90                                    | 0.205                           | 0.314                                               | SCPC                                                                 | 0.64                            | 0.31                | 0.30                | 3.17                | 2.32                | 0.55                | 0.54                | 4.03                | 3.17                | 0.86                    |
| SCPC-8                            | Solvent based-Chilled Ammonia   | 549              | 31.5                                     | 11429              | 90                                    | 0.194                           | 0.292                                               | SCPC                                                                 | 0.66                            | 0.28                | 0.27                | 2.86                | 2.10                | 0.50                | 0.49                | 3.63                | 2.86                | 0.78                    |
| SCPC-9                            | Solvent based-Chilled Ammonia   | 559              | 27.9                                     | 12903              | 90                                    | 0.215                           | 0.325                                               | SCPC                                                                 | 0.63                            | 0.31                | 0.31                | 3.23                | 2.37                | 0.56                | 0.55                | 4.10                | 3.22                | 0.88                    |
| SCPC-10                           | Solvent based-Chilled Ammonia   | 614              | 36.6                                     | 9836               | 88.4                                  | 0.192                           | 0.276                                               | SCPC                                                                 | 0.67                            | 0.24                | 0.23                | 2.46                | 1.80                | 0.43                | 0.42                | 3.13                | 2.46                | 0.67                    |
| SCPC-11                           | Solvent Based-Amine             | 519              | 25.6                                     | 14063              | 94                                    | 0.171                           | 0.291                                               | SCPC                                                                 | 0.66                            | 0.34                | 0.33                | 3.52                | 2.58                | 0.61                | 0.60                | 4.47                | 3.51                | 0.96                    |
| IGCC-1                            | Solvent Based-Selexol           | 543              | 32.6                                     | 11043              | 90                                    | 0.147                           | 0.241                                               | SCPC                                                                 | 0.71                            | 0.27                | 0.26                | 1.92                | 1.48                | 0.55                | 0.55                | 2.74                | 2.29                | 0.45                    |
| IGCC-2                            | Solvent Based-Selexol           | 513              | 31.0                                     | 11613              | 90                                    | 0.152                           | 0.251                                               | SCPC                                                                 | 0.70                            | 0.28                | 0.27                | 2.02                | 1.55                | 0.58                | 0.58                | 2.88                | 2.40                | 0.48                    |
| IGCC-4                            | Data not available              | 500              | 29.9                                     | 12040              | 86                                    | 0.204                           | 0.307                                               | SCPC                                                                 | 0.64                            | 0.29                | 0.28                | 2.09                | 1.61                | 0.60                | 0.60                | 2.99                | 2.49                | 0.49                    |
| IGCC-5                            | Solvent Based-Selexol NS        | 694              | 32.0                                     | 11250              | 90                                    | 0.145                           | 0.241                                               | SCPC                                                                 | 0.71                            | 0.27                | 0.27                | 1.96                | 1.50                | 0.56                | 0.56                | 2.79                | 2.33                | 0.46                    |
| IGCC-6                            | Solvent Based - Shift + Selexol | 455              | 35.1                                     | 10256              | 94                                    | 0.110                           | 0.197                                               | SCPC                                                                 | 0.75                            | 0.25                | 0.24                | 1.78                | 1.37                | 0.51                | 0.51                | 2.54                | 2.12                | 0.42                    |
| COXY-1                            | Oxy-fuel                        | 376.1            | 34.3                                     | 10493              | 91                                    | 0.071                           | 0.160                                               | SCPC                                                                 | 0.79                            | 0.25                | 0.25                | 1.59                | 1.14                | 0.13                | 0.13                | 1.98                | 1.52                | 0.46                    |
| COXY-2                            | Oxy-fuel                        | 352.9            | 32.2                                     | 11180              | 90                                    | 0.083                           | 0.178                                               | SCPC                                                                 | 0.77                            | 0.27                | 0.26                | 1.70                | 1.22                | 0.14                | 0.14                | 2.11                | 1.62                | 0.49                    |
| COXY-3                            | Oxy-fuel                        | 670.3            | 34.7                                     | 10369              | 94                                    | 0.048                           | 0.136                                               | SCPC                                                                 | 0.81                            | 0.25                | 0.25                | 1.58                | 1.13                | 0.13                | 0.13                | 1.95                | 1.50                | 0.45                    |

| Tag                               | Technology/Process                                                                 | Net Plant output | As-Reported Electrical Efficiency (%HHV) | Heat Rate (MJ/MWh) | Percentage of CO <sub>2</sub> Removed | Direct Greenhouse Gas Emissions | Total Cradle-To-Plant Exit Greenhouse Gas Emissions | CO <sub>2</sub> Equivalent Emissions Avoided (GHG emissions avoided) |                                 | Fuel Cycle          |                     | Operations Cooling  |                     | Operations Process  |                     | Fuel + Operations   | Fuel + Operations   | Process water discharge |
|-----------------------------------|------------------------------------------------------------------------------------|------------------|------------------------------------------|--------------------|---------------------------------------|---------------------------------|-----------------------------------------------------|----------------------------------------------------------------------|---------------------------------|---------------------|---------------------|---------------------|---------------------|---------------------|---------------------|---------------------|---------------------|-------------------------|
|                                   |                                                                                    |                  |                                          |                    |                                       |                                 |                                                     | Note a                                                               | Note b                          | Note c              | Note c              | Note d              | Note d              | Note d              | Note d              | Total withdrawal    | Total consumption   | m <sup>3</sup> /MWh     |
| Data from Adams <i>et al.</i> (6) |                                                                                    |                  |                                          |                    |                                       |                                 |                                                     |                                                                      |                                 |                     |                     |                     |                     |                     |                     |                     |                     |                         |
|                                   |                                                                                    | MWe              | %HHV                                     | MJ/MWh             | %                                     | (tCO <sub>2e</sub> /MWh)        | (tCO <sub>2e</sub> /MWh)                            |                                                                      | t CO <sub>2e</sub> /MWh avoided | m <sup>3</sup> /MWh     |
| COXY-4                            | Oxy fuel with 10% air added                                                        | 669.3            | 34.7                                     | 10384              | 94                                    | 0.048                           | 0.137                                               | SCPC                                                                 | 0.81                            | 0.25                | 0.25                | 1.58                | 1.13                | 0.13                | 0.13                | 1.96                | 1.50                | 0.45                    |
| COXY-5                            | Oxy fuel with 20% air added                                                        | 666.2            | 34.5                                     | 10432              | 94                                    | 0.048                           | 0.137                                               | SCPC                                                                 | 0.81                            | 0.25                | 0.25                | 1.59                | 1.13                | 0.13                | 0.13                | 1.97                | 1.51                | 0.46                    |
| COXY-6                            | Oxy fuel with 30% air added                                                        | 661.2            | 34.3                                     | 10511              | 94                                    | 0.048                           | 0.138                                               | SCPC                                                                 | 0.81                            | 0.25                | 0.25                | 1.60                | 1.14                | 0.13                | 0.13                | 1.98                | 1.52                | 0.46                    |
| COXY-7                            | Oxy fuel with 40% air added                                                        | 654.1            | 33.9                                     | 10626              | 94                                    | 0.049                           | 0.140                                               | SCPC                                                                 | 0.81                            | 0.26                | 0.25                | 1.62                | 1.15                | 0.13                | 0.13                | 2.00                | 1.54                | 0.46                    |
| COXY-8                            | Oxy fuel with 50% air added                                                        | 645.1            | 33.4                                     | 10775              | 94                                    | 0.050                           | 0.142                                               | SCPC                                                                 | 0.81                            | 0.26                | 0.26                | 1.64                | 1.17                | 0.13                | 0.13                | 2.03                | 1.56                | 0.47                    |
| COXY-9                            | Oxy-fuel                                                                           | 238.5            | 32.3                                     | 11149              | 90                                    | 0.136                           | 0.231                                               | SCPC                                                                 | 0.72                            | 0.27                | 0.26                | 1.69                | 1.21                | 0.14                | 0.14                | 2.10                | 1.61                | 0.49                    |
| COXY-10                           | Oxy-fuel                                                                           | 533.2            | 32.7                                     | 10996              | 93                                    | 0.053                           | 0.147                                               | SCPC                                                                 | 0.80                            | 0.27                | 0.26                | 1.67                | 1.20                | 0.14                | 0.14                | 2.07                | 1.59                | 0.48                    |
| COXY-11                           | Oxy-fuel with compression and dehydration                                          | 310.0            | 33.8                                     | 10648              | 100                                   | 0.000                           | 0.091                                               | SCPC                                                                 | 0.86                            | 0.26                | 0.25                | 1.62                | 1.16                | 0.13                | 0.13                | 2.01                | 1.54                | 0.47                    |
| COXY-12                           | Oxy-fuel with double flash purification                                            | 270.6            | 29.5                                     | 12199              | 92                                    | 0.085                           | 0.189                                               | SCPC                                                                 | 0.76                            | 0.29                | 0.29                | 1.85                | 1.33                | 0.15                | 0.15                | 2.30                | 1.77                | 0.53                    |
| COXY-13                           | Oxy-fuel with distillation purification                                            | 265.8            | 29.0                                     | 12418              | 90                                    | 0.108                           | 0.214                                               | SCPC                                                                 | 0.74                            | 0.30                | 0.29                | 1.89                | 1.35                | 0.15                | 0.15                | 2.34                | 1.80                | 0.54                    |
| COXY-14                           | Oxy-fuel                                                                           | 574              | 36.6                                     | 9836               | 90                                    | 0.119                           | 0.203                                               | SCPC                                                                 | 0.75                            | 0.24                | 0.23                | 1.50                | 1.07                | 0.12                | 0.12                | 1.85                | 1.42                | 0.43                    |
| COXY-16                           | Oxy-fuel (Case: S22F)                                                              | 549.0            | 30.1                                     | 11960              | 90.9                                  | 0.099                           | 0.201                                               | SCPC                                                                 | 0.75                            | 0.29                | 0.28                | 1.38                | 0.87                | 0.14                | 0.14                | 1.81                | 1.29                | 0.52                    |
| COXY-17                           | Oxy-fuel (Boiler type & Coal rank: USC-subbit)                                     | 509.0            | 31.5                                     | 11429              | 90                                    | 0.105                           | 0.203                                               | SCPC                                                                 | 0.75                            | 0.28                | 0.27                | 1.74                | 1.24                | 0.14                | 0.14                | 2.15                | 1.65                | 0.50                    |
| COXY-18                           | Oxy-fuel (Boiler type & Coal rank: SCPC-bit)                                       | 501.0            | 31.0                                     | 11613              | 98                                    | 0.021                           | 0.120                                               | SCPC                                                                 | 0.83                            | 0.28                | 0.27                | 1.77                | 1.26                | 0.14                | 0.14                | 2.19                | 1.68                | 0.51                    |
| COXY-19                           | Oxy-fuel (Boiler type & Coal rank: SCPC-bit)                                       | 510.0            | 31.5                                     | 11429              | 90                                    | 0.105                           | 0.203                                               | SCPC                                                                 | 0.75                            | 0.28                | 0.27                | 1.74                | 1.24                | 0.14                | 0.14                | 2.15                | 1.65                | 0.50                    |
| COXY-20                           | Oxy-fuel (Boiler type & Coal rank: USC-subbit)                                     | 833.0            | 34.1                                     | 10557              | 90                                    | 0.092                           | 0.182                                               | SCPC                                                                 | 0.77                            | 0.25                | 0.25                | 1.60                | 1.15                | 0.13                | 0.13                | 1.99                | 1.53                | 0.46                    |
| COXY-21                           | Oxy-combustion Supercritical PC with CO2 Capture                                   | 550.0            | 29.3                                     | 12287              | 99.5                                  | 0.000                           | 0.105                                               | SCPC                                                                 | 0.85                            | 0.30                | 0.29                | 1.87                | 1.34                | 0.15                | 0.15                | 2.32                | 1.78                | 0.54                    |
| COXY-22                           | Oxy-combustion Supercritical PC with CO2 Capture                                   | 555.1            | 29.5                                     | 12203              | 99.4                                  | 0.000                           | 0.104                                               | SCPC                                                                 | 0.85                            | 0.29                | 0.29                | 1.85                | 1.33                | 0.15                | 0.15                | 2.30                | 1.77                | 0.53                    |
| COXY-23                           | Oxy-combustion Supercritical PC with CO2 Capture                                   | 549.0            | 29.3                                     | 12287              | 96.9                                  | 0.027                           | 0.132                                               | SCPC                                                                 | 0.82                            | 0.30                | 0.29                | 1.87                | 1.34                | 0.15                | 0.15                | 2.32                | 1.78                | 0.54                    |
| COXY-24                           | Oxy-combustion Supercritical PC with CO2 Capture                                   | 548.7            | 29.2                                     | 12329              | 85.5                                  | 0.076                           | 0.182                                               | SCPC                                                                 | 0.77                            | 0.30                | 0.29                | 1.87                | 1.34                | 0.15                | 0.15                | 2.32                | 1.78                | 0.54                    |
| COXY-25                           | Oxy-combustion Ultra-supercritical PC with CO2 Capture                             | 550.0            | 33.0                                     | 10909              | 99.4                                  | 0.000                           | 0.093                                               | SCPC                                                                 | 0.86                            | 0.26                | 0.26                | 1.66                | 1.19                | 0.14                | 0.14                | 2.06                | 1.58                | 0.48                    |
| COXY-26                           | Oxy-combustion Ultra-supercritical PC with CO2 Capture                             | 545.3            | 32.7                                     | 11009              | 93.2                                  | 0.060                           | 0.154                                               | SCPC                                                                 | 0.80                            | 0.27                | 0.26                | 1.67                | 1.20                | 0.14                | 0.14                | 2.08                | 1.59                | 0.48                    |
| IGFC-1                            | Uses WGS to minimize CO content in SOFC feed                                       | 719.0            | 42.0                                     | 8571               | 100                                   | 0.000                           | 0.073                                               | SCPC                                                                 | 0.88                            | 0.21                | 0.20                | 0.64                | 0.39                | 0.11                | 0.10                | 0.96                | 0.70                | 0.26                    |
| IGFC-2                            | IGFC-1 but with seasonal SOFC shutdowns to preserve life during low-demand seasons | 719.0            | 42.0                                     | 8571               | 100                                   | 0.000                           | 0.073                                               | SCPC                                                                 | 0.88                            | 0.21                | 0.20                | 0.64                | 0.39                | 0.11                | 0.10                | 0.96                | 0.70                | 0.26                    |
| IGFC-3                            | IGFC-1 with integrated energy storage                                              | 719.0            | 41.5                                     | 8675               | 100                                   | 0.000                           | 0.074                                               | SCPC                                                                 | 0.88                            | 0.21                | 0.21                | 0.64                | 0.39                | 0.11                | 0.10                | 0.97                | 0.70                | 0.26                    |
| IGFC-4                            | IGFC-2 with integrated energy storage                                              | 719.0            | 40.6                                     | 8867               | 100                                   | 0.000                           | 0.076                                               | SCPC                                                                 | 0.87                            | 0.21                | 0.21                | 0.66                | 0.40                | 0.12                | 0.11                | 0.99                | 0.72                | 0.27                    |
| IGFC-5                            | Uses coal syngas directly in SOFC with no WGS                                      | 719.0            | 38.4                                     | 9375               | 100                                   | 0.000                           | 0.080                                               | SCPC                                                                 | 0.87                            | 0.23                | 0.22                | 0.70                | 0.43                | 0.12                | 0.11                | 1.05                | 0.76                | 0.29                    |
| IGFC-6                            | IGFC-5 with seasonal SOFC shutdowns                                                | 719.0            | 38.4                                     | 9373               | 100                                   | 0.000                           | 0.080                                               | SCPC                                                                 | 0.87                            | 0.23                | 0.22                | 0.70                | 0.43                | 0.12                | 0.11                | 1.05                | 0.76                | 0.28                    |
| IGFC-7                            | IGFC-5 with integrated energy storage                                              | 719.0            | 38.0                                     | 9474               | 100                                   | 0.000                           | 0.081                                               | SCPC                                                                 | 0.87                            | 0.23                | 0.22                | 0.70                | 0.43                | 0.12                | 0.11                | 1.06                | 0.77                | 0.29                    |
| IGFC-8                            | IGFC-5 with integrated energy storage                                              | 719.0            | 37.4                                     | 9626               | 100                                   | 0.000                           | 0.082                                               | SCPC                                                                 | 0.87                            | 0.23                | 0.23                | 0.72                | 0.44                | 0.13                | 0.12                | 1.07                | 0.78                | 0.29                    |

| Tag                               | Technology/Process                                                                                                   | Net Plant output | As-Reported Electrical Efficiency (%HHV) | Heat Rate (MJ/MWh) | Percentage of CO <sub>2</sub> Removed | Direct Greenhouse Gas Emissions | Total Cradle-To-Plant Exit Greenhouse Gas Emissions | CO <sub>2</sub> Equivalent Emissions Avoided (GHG emissions avoided) | Fuel Cycle                      |                     | Operations Cooling  |                     | Operations Process  |                     | Fuel + Operations   | Fuel + Operations   | Process water discharge |                     |
|-----------------------------------|----------------------------------------------------------------------------------------------------------------------|------------------|------------------------------------------|--------------------|---------------------------------------|---------------------------------|-----------------------------------------------------|----------------------------------------------------------------------|---------------------------------|---------------------|---------------------|---------------------|---------------------|---------------------|---------------------|---------------------|-------------------------|---------------------|
|                                   |                                                                                                                      |                  |                                          |                    |                                       |                                 |                                                     |                                                                      | Water Withdrawal                | Water consumption   | Water Withdrawal    | Water consumption   | Water Withdrawal    | Water consumption   | Total withdrawal    | Total consumption   |                         |                     |
| Data from Adams <i>et al.</i> (6) |                                                                                                                      |                  |                                          |                    |                                       |                                 |                                                     |                                                                      | Note a                          | Note b              | Note c              | Note c              | Note d              | Note d              | Note d              | Note d              |                         |                     |
|                                   |                                                                                                                      | MWe              | %HHV                                     | MJ/MWh             | %                                     | (tCO <sub>2</sub> e/MWh)        | (tCO <sub>2</sub> e/MWh)                            |                                                                      | t CO <sub>2</sub> e/MWh avoided | m <sup>3</sup> /MWh     | m <sup>3</sup> /MWh |
| IGFC-9                            | Atm-Pressure IGFC Plant                                                                                              | 253.0            | 49.4                                     | 7287               | 99                                    | 0.001                           | 0.064                                               | SCPC                                                                 | 0.89                            | 0.18                | 0.17                | 0.54                | 0.33                | 0.10                | 0.09                | 0.81                | 0.59                    | 0.22                |
| IGFC-10                           | Pressurized IGFC                                                                                                     | 253.0            | 56.2                                     | 6406               | 99                                    | 0.001                           | 0.056                                               | SCPC                                                                 | 0.89                            | 0.15                | 0.15                | 0.48                | 0.29                | 0.08                | 0.08                | 0.71                | 0.52                    | 0.19                |
| IGFC-11                           | Partially methanated Syngas IGFC (TREMPE)                                                                            | 846.6            | 44.4                                     | 8115               | 99                                    | 0.003                           | 0.072                                               | SCPC                                                                 | 0.88                            | 0.20                | 0.19                | 0.60                | 0.37                | 0.11                | 0.10                | 0.91                | 0.66                    | 0.25                |
| IGFC-12                           | Partially methanated Syngas IGFC (HICOM)                                                                             | 925.0            | 48.5                                     | 7425               | 99                                    | 0.006                           | 0.070                                               | SCPC                                                                 | 0.88                            | 0.18                | 0.18                | 0.55                | 0.34                | 0.10                | 0.09                | 0.83                | 0.60                    | 0.23                |
| IGFC-13                           | IGFC-DIRECT                                                                                                          | 865.0            | 45.3                                     | 7943               | 99                                    | 0.007                           | 0.075                                               | SCPC                                                                 | 0.88                            | 0.19                | 0.19                | 0.59                | 0.36                | 0.10                | 0.10                | 0.89                | 0.64                    | 0.24                |
| IGFC-14                           | Liquid-tin anode SOFC                                                                                                | 93.9             | 57.2                                     | 6294               | 100                                   | 0.000                           | 0.054                                               | SCPC                                                                 | 0.90                            | 0.15                | 0.15                | 0.47                | 0.29                | 0.08                | 0.08                | 0.70                | 0.51                    | 0.19                |
| NGCC-2                            | Solvent Based - MEA                                                                                                  | 789.0            | 46                                       | 7809               | 90                                    | 0.044                           | 0.115                                               | NGCC                                                                 | 0.29                            | 0.07                | 0.07                | 1.61                | 1.21                | 0.01                | 0.01                | 1.69                | 1.29                    | 0.41                |
| NGCC-3                            | Solvent Based - Advanced Amine                                                                                       | 804.0            | 47                                       | 7660               | 90                                    | 0.043                           | 0.113                                               | NGCC                                                                 | 0.29                            | 0.07                | 0.07                | 1.58                | 1.18                | 0.01                | 0.01                | 1.66                | 1.26                    | 0.40                |
| NGCC-4                            | Solvent Based - Econamine FG+                                                                                        | 448.9            | 43                                       | 8451               | 90                                    | 0.046                           | 0.123                                               | NGCC                                                                 | 0.28                            | 0.08                | 0.08                | 1.74                | 1.30                | 0.01                | 0.01                | 1.83                | 1.40                    | 0.44                |
| NGCC-5                            | Solvent Based - Amine                                                                                                | 485.0            | 42                                       | 8491               | 90                                    | 0.045                           | 0.122                                               | NGCC                                                                 | 0.28                            | 0.08                | 0.08                | 1.75                | 1.31                | 0.01                | 0.01                | 1.84                | 1.40                    | 0.44                |
| NGCC-6                            | Solvent Based - Amine                                                                                                | 389.0            | 41                                       | 8824               | 94                                    | 0.030                           | 0.110                                               | NGCC                                                                 | 0.30                            | 0.08                | 0.08                | 1.82                | 1.36                | 0.01                | 0.01                | 1.92                | 1.46                    | 0.46                |
| NGFC-1                            | SOFC base case (\$1000/kW installed)                                                                                 | 693.0            | 74                                       | 4865               | 100                                   | 0.000                           | 0.044                                               | NGCC                                                                 | 0.36                            | 0.05                | 0.04                | 0.55                | 0.38                | 0.04                | 0.04                | 0.60                | 0.42                    | 0.18                |
| NGFC-6                            | Low pressure autothermal reforming (ATR)-six parallel SOFC sections. (BASELINE CASE1-1)                              | 550.0            | 56                                       | 6394               | -                                     | 0.000                           | 0.059                                               | SCPC                                                                 | 0.35                            | 0.06                | 0.06                | 0.72                | 0.49                | 0.06                | 0.06                | 0.67                | 0.4485                  | 0.22                |
| NGFC-7                            | Low pressure ATR-eight parallel SOFC sections. ASU oxidant capacity is 58% smaller than the previous case (CASE 1-7) | 550.0            | 62                                       | 5825               | -                                     | 0.000                           | 0.053                                               | SCPC                                                                 | 0.35                            | 0.06                | 0.05                | 0.66                | 0.45                | 0.05                | 0.05                | 0.61                | 0.41                    | 0.20                |
| NGFC-8                            | High pressure ATR (CASE 2-1)                                                                                         | 550.0            | 65                                       | 5556               | -                                     | 0.004                           | 0.055                                               | SCPC                                                                 | 0.35                            | 0.05                | 0.05                | 0.63                | 0.43                | 0.05                | 0.05                | 0.70                | 0.55                    | 0.15                |
| NGFC-9                            | High pressure ATR- ASU oxidant capacity is 58% smaller than the previous case (CASE 2-3)                             | 550.0            | 65                                       | 5556               | -                                     | 0.004                           | 0.055                                               | SCPC                                                                 | 0.35                            | 0.05                | 0.05                | 0.63                | 0.43                | 0.05                | 0.05                | 0.48                | 0.31                    | 0.16                |
| NGFC-10                           | No ATR (CASE 3-1)                                                                                                    | 550.0            | 66                                       | 5463               | -                                     | 0.000                           | 0.050                                               | SCPC                                                                 | 0.36                            | 0.05                | 0.05                | 0.62                | 0.42                | 0.05                | 0.05                | 0.52                | 0.35                    | 0.17                |

## 17 Notes and references

- 18 1. Macknick J, Newmark R, Heath G, Hallett KC. Operational water consumption and withdrawal factors for electricity generating  
19 technologies: A review of existing literature. Vol. 7, Environmental Research Letters, 2012, **7**, 045802.
- 20 2. Spang ES, Moomaw WR, Gallagher KS, Kirshen PH, Marks DH. The water consumption of energy production: An international  
21 comparison. Environ Res Lett. 2014;9(10).
- 22 3. Meldrum J, Nettles-Anderson S, Heath G, Macknick J. Life cycle water use for electricity generation: A review and harmonization of  
23 literature estimates. Vol. 8, Environmental Research Letters, 2013, **8**, 015031.
- 24 4. Pfister S, Koehler A, Hellweg S. Assessing the environmental impacts of freshwater consumption in LCA. Environ Sci Technol.  
25 2009;43(11):4098–104.
- 26 5. Luck M, Landis M, Gassert F. Aqueduct Water Stress Projections: Decadal Projections of Water Supply and Demand Using CMIP5  
27 GCMs. Technical Note (Washington, DC: World Resources Institute). 2015.
- 28 6. Adams II TA, Hoseinzade L, Madabhushi PB, Okeke II. Comparison of CO<sub>2</sub> capture approaches for fossil-based power generation:  
29 Review and meta-study. Vol. 5, Processes. 2017, **5**(3), 44.
- 30
